# Supplementary material for: DNA Methylation Profiling for Diagnosing Undifferentiated Sarcoma with Capicua Transcriptional Receptor (CIC) Alterations
Source: PubMed Central journal article supplement (PMC7084764; doi:10.3390/ijms21051818), 2020-03-06
Supplement: ijms-21-01818-s001.pdf [file ijms-21-01818-s001.pdf]

Search:

Strong Fusions & Oncogenic Isoforms
  Low Confidence Fusions
  All Results
  New

| Actions | Classification | Report | Artifact   | Genes | SS  | Reads | %Reads | Strong | Brkpt                         | Cat    | Type | InFrame | TO | Rept |
|---------|----------------|--------|------------|-------|-----|-------|--------|--------|-------------------------------|--------|------|---------|----|------|
|         | No             | No     | CIC → DUX4 |       | 270 | 503   | 65.92  | True   | chr19:42799214,chr4:191006179 | Fusion |      | True    | 3  | 0    |

| GSP2s                | Filters | Reads (#/%) | Start Sites |
|----------------------|---------|-------------|-------------|
| CIC_e_u.020_0_1_GSP2 |         | 503 / 65.92 | 270         |

Showing 1 to 1 of 1 entries  
 Show 25 entries

Export Data (CSV) Download Source (TSV (/analysis/5513/Sarc1\_S1\_L001\_R1\_001\_full\_results.txt))

Previous 1 Next

**Supplementary Figure 1:** Archer analysis software version 5.0 reveals the CIC-DUX4 rearrangement: CIC (Exon20)→DUX4 (Exon1) (chr19:42799214,chr4:191006179) detected in our patient.
